# Supplementary material for: Dynamic spatiotemporal beams that combine two independent and controllable orbital-angular-momenta using multiple optical-frequency-comb lines
Source: PubMed Central journal article supplement (PMC7427811; doi:10.1038/s41467-020-17805-1), 2020-08-14
Supplement: 41467_2020_17805_MOESM2_ESM.pdf [file 41467_2020_17805_MOESM2_ESM.pdf]

## Description of Additional Supplementary Files

File name: Supplementary Movie 1

Description: The time-variant amplitude and phase profiles of the rotating-revolving  $LG_{\bar{\ell},0}$  beams with the value of  $\bar{\ell}$  varied from -1 to +3.  $\bar{\ell}$  represents the number of  $2\pi$  phase changes along the azimuthal direction around the beam center.
